# Supplementary material
Source: PubMed Central journal article supplement (PMC7612052)
Supplement: EMS140020-supplement-Tables_S1_S2.pdf [file EMS140020-supplement-Tables_S1_S2.pdf]

## Supplementary information

---

# Ten recent insights for our understanding of cooperation

---

In the format provided by the authors and unedited

**Ten Recent Insights for Our Understanding of Cooperation**  
Stuart A. West, Guy A. Cooper, Melanie B. Ghoul & Ashleigh S. Griffin

**Supplementary Information**

**1. Supplementary Information: Relatedness and Cooperation**

Insight 1 summarises how relatedness ( $R$ ) between interacting individuals has been shown to have a clear and consistent influence on the evolution of cooperation. Here, we summarise this data in two tables.

| <b>Organisms</b>                                                        | <b>Group formation</b>     | <b>Pattern</b>                                                                                                                                                                                                                                                                                                                                                                                                                                           |
|-------------------------------------------------------------------------|----------------------------|----------------------------------------------------------------------------------------------------------------------------------------------------------------------------------------------------------------------------------------------------------------------------------------------------------------------------------------------------------------------------------------------------------------------------------------------------------|
| Asexual single-celled organisms (e.g. bacteria, fungi and slime moulds) | Staying versus aggregating | Species that form groups by staying with their parent (clonal groups, $R=1$ ):<br>(i) are more likely to have altruistic sterile helpers;<br>(ii) have larger social groups;<br>(iii) have more cells types (greater division of labour);<br>compared with species that form groups by aggregating (potentially non-clonal, $R<1$ ) <sup>1</sup> .                                                                                                       |
| Birds                                                                   | Staying versus aggregating | Species that form groups by offspring remaining at the nest, with their parents, show higher levels of cooperation, compared with species that form groups by aggregating <sup>2</sup> .                                                                                                                                                                                                                                                                 |
| Insects                                                                 | Staying versus aggregating | Within social insect species where groups can be formed in both ways, groups that form by remaining with their parents cooperate at higher levels than groups that form by aggregating <sup>3</sup> .                                                                                                                                                                                                                                                    |
| Bacteria, Fungi                                                         | Number of clones per group | When relatedness is manipulated experimentally, cooperation is favoured when relatedness is high, but not when relatedness is low <sup>4-8</sup> .                                                                                                                                                                                                                                                                                                       |
| Birds                                                                   | Monogamy                   | Across birds species:<br>(i) females of cooperative species mate with less males, and are more likely to be monogamous, than species which do not breed cooperatively <sup>9,10</sup> ;<br>(ii) evolutionary transitions from non-cooperative to cooperative breeding tended to occur in relatively monogamous species, where males mate with less females <sup>9,10</sup> ;<br>(iii) the percentage of nests that have cooperative helpers is higher in |

|              |          |                                                                                                                                                                                                                |
|--------------|----------|----------------------------------------------------------------------------------------------------------------------------------------------------------------------------------------------------------------|
|              |          | species where females mate with fewer males <sup>10</sup> ;<br>(iv) helpers provided more food to offspring in species where the helpers were more related to the young they were provisioning <sup>11</sup> . |
| Mammals      | Monogamy | Cooperative breeding has only evolved in socially monogamous species where females tend to only mate one male <sup>12</sup> .                                                                                  |
| Insects      | Monogamy | Eusociality has only evolved in species with lifetime monogamy <sup>13,14</sup> .                                                                                                                              |
| Shrimps      | Monogamy | The evolution of cooperative breeding is associated with monogamy <sup>15</sup> .                                                                                                                              |
| Ants & bees. | Monogamy | Species with either multiple mating or multiple queens, showed greater polymorphism in genes upregulated in the worker caste compared with genes upregulated in the reproductive caste <sup>16-18</sup> .      |

**Supplementary Table 1. Group formation and cooperation.** The method of group formation determines relatedness within that group. The method of group formation is consistently correlated with whether and how much cooperation occurs, across the tree of life. The citations are examples and not exhaustive.

| Influences relatedness          | Increased cooperation in                                                  | Form of evidence                                             |
|---------------------------------|---------------------------------------------------------------------------|--------------------------------------------------------------|
| Staying together (with parents) | Bacteria, birds, fungi, insects, mammals, shrimps, slime moulds, viruses. | Comparative across species, experimental evolution, genomic. |
| Monogamy                        | Birds, insects, mammals, shrimps.                                         | Comparative across species, genomic.                         |
| Kin discrimination              | Birds, insects, mammals, shrimps, slime moulds.                           | Comparative across species, experimental, observational.     |

**Supplementary Table 2. Relatedness and cooperation.** The same factors have been implicated in determining relatedness and the level of cooperation time and time again, across diverse taxa, and with a variety of methodologies. Our summary is illustrative not exhaustive.

## References

1. Fisher, R. M., Cornwallis, C. K. & West, S. A. Group Formation, Relatedness, and the Evolution of Multicellularity. *Current Biology* **23**, 1120–1125 (2013).
2. Downing, P. A., Griffin, A. S. & Cornwallis, C. K. Group formation and the evolutionary pathway to complex sociality in birds. *Nat. ecol. evol.* **215**, 1–13 (2020).
3. Reeve, H. K. & Keller, L. Partitioning of Reproduction in Mother-Daughter Versus Sibling Associations - a Test of Optimal Skew Theory. *Am Nat* **145**, 119–132 (1995).

4. Griffin, A. S., West, S. A. & Buckling, A. Cooperation and competition in pathogenic bacteria. *Nature* **430**, 1024–1027 (2004).
5. Diggle, S. P., West, S. A., Griffin, A. S. & Campbell, G. S. Cooperation and conflict in quorum-sensing bacterial populations. *Nature* **450**, 411–414 (2007).
6. Rumbaugh, K. P. *et al.* Kin selection, quorum sensing and virulence in pathogenic bacteria. *Proceedings of the Royal Society B: Biological Sciences* **279**, 3584–3588 (2012).
7. Pollitt, E. J. G., West, S. A., Crusz, S. A., Burton-Chellew, M. N. & Diggle, S. P. Cooperation, quorum sensing, and evolution of virulence in *Staphylococcus aureus*. *Infection and Immunity* **82**, 1045–1051 (2014).
8. Bastiaans, E., Debets, A. J. M. & Aanen, D. K. Experimental evolution reveals that high relatedness protects multicellular cooperation from cheaters. *Nature Communications* **7**, 1–10 (2016).
9. Cornwallis, C. K. *et al.* Cooperation facilitates the colonization of harsh environments. *Nat. ecol. evol.* **1**, 0057–10 (2017).
10. Promiscuity and the evolutionary transition to complex societies. **466**, 969–972 (2011).
11. Green, J. P. & Hatchwell, B. J. Inclusive fitness consequences of dispersal decisions in a cooperatively breeding bird, the long-tailed tit (*Aegithalos caudatus*). *Proceedings of the National Academy of Sciences* **115**, 12011–12016 (2018).
12. Lukas, D. & Clutton-Brock, T. H. Cooperative breeding and monogamy in mammalian societies. *Proceedings of the Royal Society B: Biological Sciences* **279**, 2151–2156 (2012).
13. Boomsma, J. J. Kin Selection versus Sexual Selection: Why the Ends Do Not Meet. *Current Biology* **17**, R673–R683 (2007).
14. Hughes, W. O. H., Oldroyd, B. P., Beekman, M. & Ratnieks, F. L. W. Ancestral monogamy shows kin selection is key to the evolution of eusociality. *Science* **320**, 1213–1213 (2008).
15. Duffy, J. E. & Macdonald, K. S. Kin structure, ecology and the evolution of social organization in shrimp: a comparative analysis. *Proceedings of the Royal Society B: Biological Sciences* **277**, 575–584 (2009).
16. Hall, D. W., Yi, S. V. & Goodisman, M. A. D. Kin selection, genomics and caste-antagonistic pleiotropy. *Biology Letters* **9**, 20130309–20130309 (2013).
17. Hall, D. W. & Goodisman, M. A. D. The Effects of Kin Selection on Rates of Molecular Evolution in Social Insects. *Evolution* **66**, 2080–2093 (2012).
18. Warner, M. R., Mikheyev, A. S. & Linksvayer, T. A. Genomic Signature of Kin Selection in an Ant with Obligately Sterile Workers. *Molecular Biology and Evolution* **34**, 1780–1787 (2017).
